# Supplementary material for: Knowledge, attitude, and practice regarding dengue virus infection among inhabitants of Aceh, Indonesia: a cross-sectional study
Source: BMC Infect Dis. 2018 Feb 27;18:96. doi: 10.1186/s12879-018-3006-z (PMC5830327; doi:10.1186/s12879-018-3006-z)
Supplement: Supplementary file 2 — Distribution of the knowledge regarding dengue fever among participant groups with different socioeconomic level. (PDF 154 kb) [file 12879_2018_3006_MOESM2_ESM.pdf]

Additional file 2 – Table. Distribution of the knowledge regarding dengue fever among participant groups with different socioeconomic level

| Variables                                                                                                           | 1 <sup>st</sup> quintile<br>(n=122) | 2 <sup>nd</sup> quintile<br>(n=123) | 3 <sup>rd</sup> quintile<br>(n=122) | 4 <sup>th</sup> quintile<br>(n=121) | 5 <sup>th</sup> quintile<br>(n=121) | P-<br>value* |
|---------------------------------------------------------------------------------------------------------------------|-------------------------------------|-------------------------------------|-------------------------------------|-------------------------------------|-------------------------------------|--------------|
|                                                                                                                     | n (%)                               |              |
| Dengue is caused by a virus. Yes                                                                                    | 95 (77.9)                           | 109 (88.6)                          | 87 (71.3)                           | 102 (84.3)                          | 106 (87.6)                          | 0.002        |
| Can all mosquitoes transmit dengue virus? No                                                                        | 72 (59.0)                           | 91 (74.0)                           | 82 (67.2)                           | 93 (76.9)                           | 101 (83.5)                          | 0.000        |
| Do the <i>Aedes</i> mosquitoes transmit dengue virus? Yes                                                           | 106 (86.9)                          | 111 (90.2)                          | 115 (94.3)                          | 114 (94.2)                          | 115 (95.0)                          | 0.087        |
| Do flies transmit dengue virus? No                                                                                  | 75 (61.5)                           | 99 (80.5)                           | 103 (84.4)                          | 97 (80.2)                           | 101 (83.5)                          | 0.000        |
| Do ticks transmit dengue virus? No                                                                                  | 82 (67.2)                           | 99 (80.5)                           | 98 (80.3)                           | 98 (81.0)                           | 100 (82.6)                          | 0.023        |
| Does casual person to person contact transmit DF? No                                                                | 62 (50.8)                           | 84 (68.3)                           | 71 (58.2)                           | 76 (62.8)                           | 80 (66.1)                           | 0.052        |
| Is dengue virus transmitted through food and water? No                                                              | 81 (66.4)                           | 91 (74.0)                           | 94 (77.0)                           | 93 (76.9)                           | 95 (78.5)                           | 0.196        |
| Do mosquitoes breed in standing water? Yes                                                                          | 106 (86.9)                          | 113 (91.9)                          | 113 (92.6)                          | 110 (90.9)                          | 115 (95.0)                          | 0.236        |
| Do window screens and bed net reduce mosquitoes? Yes                                                                | 108 (88.5)                          | 115 (93.5)                          | 114 (93.4)                          | 115 (95.0)                          | 119 (98.3)                          | 0.034        |
| Do insecticide sprays (such as Baygon) reduce mosquitoes and prevent DF?                                            |                                     |                                     |                                     |                                     |                                     |              |
| Yes                                                                                                                 | 103 (84.4)                          | 112 (91.1)                          | 113 (92.6)                          | 116 (95.9)                          | 117 (96.7)                          | 0.003        |
| Do tightly covered water containers reduce mosquitoes? Yes                                                          | 110 (90.2)                          | 115 (93.5)                          | 114 (93.4)                          | 113 (93.4)                          | 117 (96.7)                          | 0.377        |
| Do mosquito repellents prevent mosquito bites? Yes                                                                  | 110 (90.2)                          | 108 (87.8)                          | 111 (91.0)                          | 114 (94.2)                          | 117 (96.7)                          | 0.090        |
| Is dengue virus transmitted to humans by the bite of female <i>Aedes</i> mosquitoes<br>that have been infected? Yes | 62 (50.8)                           | 61 (49.6)                           | 54 (44.3)                           | 68 (56.2)                           | 82 (67.8)                           | 0.004        |
| Is the rainy season the only season when DF is present? No                                                          | 58 (47.5)                           | 76 (61.8)                           | 76 (62.3)                           | 73 (60.3)                           | 68 (56.2)                           | 0.111        |
| Can you identify <i>Aedes</i> mosquitoes? Yes                                                                       | 36 (29.5)                           | 47 (38.2)                           | 45 (36.9)                           | 59 (48.8)                           | 63 (52.1)                           | 0.002        |
| When are the <i>Aedes</i> mosquitoes most likely to feed/bite? Day time                                             | 24 (19.7)                           | 51 (41.5)                           | 60 (49.2)                           | 55 (45.5)                           | 56 (46.3)                           | 0.000        |
| Is headache a symptom of DF? Yes                                                                                    | 103 (84.4)                          | 96 (78.0)                           | 95 (77.9)                           | 95 (78.5)                           | 113 (93.4)                          | 0.005        |
| Is joint pain a symptom of DF? Yes                                                                                  | 100 (82.0)                          | 103 (83.7)                          | 100 (82.0)                          | 107 (88.4)                          | 114 (94.2)                          | 0.024        |

[illegible]
