# Supplementary material for: Knowledge, attitude, and practice regarding dengue virus infection among inhabitants of Aceh, Indonesia: a cross-sectional study
Source: BMC Infect Dis. 2018 Feb 27;18:96. doi: 10.1186/s12879-018-3006-z (PMC5830327; doi:10.1186/s12879-018-3006-z)
Supplement: Supplementary file 3 — Distribution of attitude regarding dengue fever among participant groups with different socioeconomic level. (PDF 195 kb) [file 12879_2018_3006_MOESM3_ESM.pdf]

Additional file 3 – Table. Distribution of attitude regarding dengue fever among participant groups with different socioeconomic level

| Variables                                                                                                                              | 1 <sup>st</sup> quintile<br>(n=122) | 2 <sup>nd</sup> quintile<br>(n=123) | 3 <sup>rd</sup> quintile<br>(n=122) | 4 <sup>th</sup> quintile<br>(n=121) | 5 <sup>th</sup> quintile<br>(n=121) | P-value* |
|----------------------------------------------------------------------------------------------------------------------------------------|-------------------------------------|-------------------------------------|-------------------------------------|-------------------------------------|-------------------------------------|----------|
|                                                                                                                                        | n (%)                               |          |
| Is DF a serious illness?                                                                                                               |                                     |                                     |                                     |                                     |                                     | 0.013    |
| Strongly agree                                                                                                                         | 57 (46.7)                           | 59 (48.0)                           | 43 (35.2)                           | 53 (43.8)                           | 64 (52.9)                           |          |
| Agree                                                                                                                                  | 35 (28.7)                           | 43 (35.0)                           | 53 (43.4)                           | 45 (37.2)                           | 43 (35.5)                           |          |
| Not sure                                                                                                                               | 10 (8.2)                            | 2 (1.6)                             | 1 (0.8)                             | 2 (1.6)                             | 2 (1.7)                             |          |
| Disagree                                                                                                                               | 10 (8.2)                            | 6 (4.9)                             | 12 (9.8)                            | 10 (8.3)                            | 4 (3.3)                             |          |
| Strongly disagree                                                                                                                      | 10 (8.2)                            | 13 (10.5)                           | 13 (10.8)                           | 11 (9.1)                            | 8 (6.6)                             |          |
| Are you at risk of getting DF?                                                                                                         |                                     |                                     |                                     |                                     |                                     | 0.325    |
| Strongly agree                                                                                                                         | 16 (13.1)                           | 17 (13.8)                           | 15 (12.3)                           | 13 (10.7)                           | 26 (21.5)                           |          |
| Agree                                                                                                                                  | 43 (35.2)                           | 39 (31.7)                           | 41 (33.6)                           | 43 (35.5)                           | 49 (40.5)                           |          |
| Not sure                                                                                                                               | 16 (13.1)                           | 23 (18.7)                           | 18 (14.8)                           | 24 (19.8)                           | 13 (10.7)                           |          |
| Disagree                                                                                                                               | 36 (29.5)                           | 34 (27.6)                           | 33 (27.0)                           | 33 (27.3)                           | 22 (18.2)                           |          |
| Strongly disagree                                                                                                                      | 11 (9.0)                            | 10 (8.2)                            | 15 (12.3)                           | 8 (6.6)                             | 11 (9.1)                            |          |
| Can DF be prevented?                                                                                                                   |                                     |                                     |                                     |                                     |                                     |          |
| Strongly agree                                                                                                                         | 41 (33.6)                           | 45 (36.6)                           | 42 (34.4)                           | 43 (35.5)                           | 67 (55.4)                           | 0.097    |
| Agree                                                                                                                                  | 57 (46.7)                           | 51 (41.5)                           | 50 (41.0)                           | 53 (43.8)                           | 40 (33.1)                           |          |
| Not sure                                                                                                                               | 8 (6.6)                             | 8 (6.5)                             | 5 (4.1)                             | 7 (5.8)                             | 3 (2.4)                             |          |
| Disagree                                                                                                                               | 11 (9.0)                            | 9 (7.3)                             | 14 (11.5)                           | 10 (8.3)                            | 6 (5.0)                             |          |
| Strongly disagree                                                                                                                      | 5 (4.1)                             | 10 (8.1)                            | 11 (9.0)                            | 8 (6.6)                             | 5 (4.1)                             |          |
| Is controlling the breeding places of mosquitoes a good strategy to prevent DF?                                                        |                                     |                                     |                                     |                                     |                                     | 0.002    |
| Strongly agree                                                                                                                         | 30 (24.6)                           | 48 (39.0)                           | 35 (28.7)                           | 47 (38.8)                           | 53 (43.8)                           |          |
| Agree                                                                                                                                  | 53 (43.4)                           | 47 (38.2)                           | 52 (42.6)                           | 46 (38.0)                           | 49 (40.5)                           |          |
| Not sure                                                                                                                               | 21 (17.2)                           | 7 (5.7)                             | 6 (4.9)                             | 7 (5.8)                             | 10 (8.3)                            |          |
| Disagree                                                                                                                               | 11 (9.0)                            | 13 (10.6)                           | 22 (18.0)                           | 15 (12.4)                           | 6 (5.0)                             |          |
| Strongly disagree                                                                                                                      | 7 (5.7)                             | 8 (6.5)                             | 7 (5.7)                             | 6 (5.0)                             | 3 (2.5)                             |          |
| Do you think that stagnant water around the house in discarded tyres, broken pots and bottles is a breeding place of Aedes mosquitoes? |                                     |                                     |                                     |                                     |                                     | 0.014    |
| Strongly agree                                                                                                                         | 37 (30.3)                           | 52 (42.3)                           | 43 (35.2)                           | 52 (43.0)                           | 67 (55.4)                           |          |
| Agree                                                                                                                                  | 53 (43.4)                           | 41 (33.3)                           | 45 (36.9)                           | 45 (37.2)                           | 39 (32.2)                           |          |
| Not sure                                                                                                                               | 13 (10.7)                           | 10 (8.1)                            | 10 (8.2)                            | 3 (2.5)                             | 4 (3.3)                             |          |
| Disagree                                                                                                                               | 13 (10.7)                           | 9 (7.3)                             | 14 (11.5)                           | 10 (8.3)                            | 8 (6.6)                             |          |
| Strongly disagree                                                                                                                      | 6 (4.9)                             | 11 (8.9)                            | 10 (8.2)                            | 11 (9.1)                            | 3 (2.5)                             |          |

| Variables                                                                                        | 1 <sup>st</sup> quintile<br>(n=122) | 2 <sup>nd</sup> quintile<br>(n=123) | 3 <sup>rd</sup> quintile<br>(n=122) | 4 <sup>th</sup> quintile<br>(n=121) | 5 <sup>th</sup> quintile<br>(n=121) | P-value* |
|--------------------------------------------------------------------------------------------------|-------------------------------------|-------------------------------------|-------------------------------------|-------------------------------------|-------------------------------------|----------|
|                                                                                                  | n (%)                               |          |
| Do you think communities should actively participate in controlling the vectors of DF?           |                                     |                                     |                                     |                                     |                                     | 0.017    |
| Strongly agree                                                                                   | 37 (30.3)                           | 50 (40.7)                           | 40 (33.1)                           | 51 (42.1)                           | 63 (52.1)                           |          |
| Agree                                                                                            | 50 (41.0)                           | 41 (33.3)                           | 48 (39.7)                           | 39 (32.2)                           | 40 (33.1)                           |          |
| Not sure                                                                                         | 16 (13.1)                           | 15 (12.2)                           | 5 (4.1)                             | 8 (6.6)                             | 5 (4.1)                             |          |
| Disagree                                                                                         | 12 (9.8)                            | 8 (6.5)                             | 17 (14.0)                           | 11 (9.1)                            | 6 (5.0)                             |          |
| Strongly disagree                                                                                | 7 (5.7)                             | 9 (7.3)                             | 11 (9.1)                            | 12 (9.9)                            | 7 (5.8)                             |          |
| Everyone has a chance to suffer from DF.                                                         |                                     |                                     |                                     |                                     |                                     | 0.000    |
| Strongly agree                                                                                   | 28 (23.0)                           | 29 (23.6)                           | 28 (23.0)                           | 36 (29.8)                           | 38 (31.4)                           |          |
| Agree                                                                                            | 41 (33.6)                           | 66 (53.7)                           | 55 (45.1)                           | 51 (42.1)                           | 56 (46.3)                           |          |
| Not sure                                                                                         | 31 (25.4)                           | 9 (7.3)                             | 9 (7.4)                             | 8 (6.6)                             | 12 (9.9)                            |          |
| Disagree                                                                                         | 13 (10.7)                           | 11 (8.9)                            | 16 (13.1)                           | 16 (13.2)                           | 11 (9.1)                            |          |
| Strongly disagree                                                                                | 9 (7.4)                             | 8 (6.5)                             | 14 (11.5)                           | 10 (8.3)                            | 4 (3.3)                             |          |
| If I experience signs and symptoms of DF, I would immediately come to a Community Health Centre. |                                     |                                     |                                     |                                     |                                     | 0.045    |
| Strongly agree                                                                                   | 51 (41.8)                           | 50 (40.7)                           | 39 (32.0)                           | 56 (46.3)                           | 62 (51.2)                           |          |
| Agree                                                                                            | 46 (37.7)                           | 43 (35.0)                           | 56 (45.9)                           | 38 (31.4)                           | 44 (36.4)                           |          |
| Not sure                                                                                         | 9 (7.4)                             | 8 (6.5)                             | 3 (2.5)                             | 8 (6.6)                             | 4 (3.3)                             |          |
| Disagree                                                                                         | 11 (9.0)                            | 8 (6.5)                             | 11 (9.0)                            | 5 (4.1)                             | 6 (5.0)                             |          |
| Strongly disagree                                                                                | 5 (4.1)                             | 14 (11.4)                           | 13 (10.7)                           | 14 (11.6)                           | 5 (4.1)                             |          |
| You are the key individuals in preventing DF.                                                    |                                     |                                     |                                     |                                     |                                     | 0.402    |
| Strongly agree                                                                                   | 27 (22.1)                           | 34 (27.6)                           | 23 (18.9)                           | 34 (28.1)                           | 42 (34.7)                           |          |
| Agree                                                                                            | 52 (42.6)                           | 48 (39.0)                           | 51 (41.8)                           | 47 (38.8)                           | 50 (41.3)                           |          |
| Not sure                                                                                         | 23 (18.9)                           | 20 (16.3)                           | 25 (20.5)                           | 20 (16.5)                           | 18 (14.9)                           |          |
| Disagree                                                                                         | 15 (12.3)                           | 19 (15.4)                           | 16 (13.1)                           | 14 (11.6)                           | 8 (6.6)                             |          |
| Strongly disagree                                                                                | 5 (4.1)                             | 2 (1.6)                             | 7 (5.7)                             | 6 (5.0)                             | 3 (2.5)                             |          |
| All DF patients have the chance of a full recovery.                                              |                                     |                                     |                                     |                                     |                                     | 0.030    |
| Strongly agree                                                                                   | 38 (31.1)                           | 43 (35.0)                           | 35 (28.7)                           | 49 (40.5)                           | 50 (41.3)                           |          |
| Agree                                                                                            | 49 (40.2)                           | 48 (39.0)                           | 44 (36.1)                           | 43 (35.5)                           | 53 (43.8)                           |          |
| Not sure                                                                                         | 21 (17.2)                           | 10 (8.1)                            | 19 (15.6)                           | 7 (5.8)                             | 8 (6.6)                             |          |
| Disagree                                                                                         | 10 (8.2)                            | 14 (11.4)                           | 17 (13.9)                           | 13 (10.7)                           | 8 (6.6)                             |          |
| Strongly disagree                                                                                | 4 (3.3)                             | 8 (6.5)                             | 7 (5.7)                             | 9 (7.4)                             | 2 (1.7)                             |          |
| The government is doing their best to prevent DF.                                                |                                     |                                     |                                     |                                     |                                     | 0.117    |
| Strongly agree                                                                                   | 21 (17.2)                           | 12 (9.8)                            | 12 (9.8)                            | 15 (12.4)                           | 18 (14.9)                           |          |
| Agree                                                                                            | 36 (29.5)                           | 28 (22.8)                           | 29 (23.8)                           | 36 (29.8)                           | 47 (38.8)                           |          |
| Not sure                                                                                         | 41 (33.6)                           | 57 (46.3)                           | 49 (40.2)                           | 37 (30.6)                           | 37 (30.6)                           |          |

| Variables                                                                                                                     | 1 <sup>st</sup> quintile<br>(n=122) | 2 <sup>nd</sup> quintile<br>(n=123) | 3 <sup>rd</sup> quintile<br>(n=122) | 4 <sup>th</sup> quintile<br>(n=121) | 5 <sup>th</sup> quintile<br>(n=121) | P-value* |
|-------------------------------------------------------------------------------------------------------------------------------|-------------------------------------|-------------------------------------|-------------------------------------|-------------------------------------|-------------------------------------|----------|
|                                                                                                                               | n (%)                               |          |
| Disagree                                                                                                                      | 18 (14.8)                           | 20 (16.3)                           | 26 (21.3)                           | 27 (22.3)                           | 15 (12.4)                           | 0.056    |
| Strongly disagree                                                                                                             | 6 (4.9)                             | 6 (4.9)                             | 6 (4.9)                             | 6 (5.0)                             | 4 (3.3)                             |          |
| Your neighborhood is a DF high-risk area.                                                                                     |                                     |                                     |                                     |                                     |                                     |          |
| Strongly agree                                                                                                                | 12 (9.8)                            | 8 (6.5)                             | 15 (12.3)                           | 14 (11.6)                           | 20 (16.5)                           |          |
| Agree                                                                                                                         | 24 (19.7)                           | 39 (31.7)                           | 27 (22.1)                           | 37 (30.6)                           | 30 (24.8)                           |          |
| Not sure                                                                                                                      | 46 (37.7)                           | 43 (35.0)                           | 41 (33.6)                           | 36 (29.8)                           | 47 (38.8)                           |          |
| Disagree                                                                                                                      | 31 (25.4)                           | 29 (23.6)                           | 36 (29.5)                           | 32 (26.4)                           | 23 (19.0)                           | 0.447    |
| Strongly disagree                                                                                                             | 9 (7.4)                             | 4 (3.3)                             | 3 (2.5)                             | 2 (1.7)                             | 1 (0.8)                             |          |
| Community members are capable of preventing DF.                                                                               |                                     |                                     |                                     |                                     |                                     |          |
| Strongly agree                                                                                                                | 21 (17.2)                           | 30 (24.4)                           | 24 (19.7)                           | 26 (21.5)                           | 37 (30.6)                           |          |
| Agree                                                                                                                         | 43 (35.2)                           | 45 (36.6)                           | 45 (36.9)                           | 52 (43.0)                           | 51 (42.1)                           |          |
| Not sure                                                                                                                      | 35 (28.7)                           | 26 (21.1)                           | 30 (24.6)                           | 24 (19.8)                           | 21 (17.4)                           |          |
| Disagree                                                                                                                      | 17 (13.9)                           | 17 (13.8)                           | 18 (14.8)                           | 15 (12.4)                           | 10 (8.3)                            | 0.010    |
| Strongly disagree                                                                                                             | 6 (4.9)                             | 5 (4.1)                             | 5 (4.1)                             | 4 (3.3)                             | 2 (1.7)                             |          |
| You are capable of preventing DF.                                                                                             |                                     |                                     |                                     |                                     |                                     |          |
| Strongly agree                                                                                                                | 22 (18.0)                           | 14 (11.4)                           | 22 (18.0)                           | 20 (16.5)                           | 33 (27.2)                           |          |
| Agree                                                                                                                         | 42 (34.4)                           | 57 (46.3)                           | 40 (32.8)                           | 57 (47.1)                           | 58 (47.9)                           |          |
| Not sure                                                                                                                      | 37 (30.3)                           | 31 (25.2)                           | 36 (29.5)                           | 21 (17.4)                           | 20 (16.5)                           |          |
| Disagree                                                                                                                      | 14 (11.5)                           | 16 (13.0)                           | 19 (15.6)                           | 17 (14.0)                           | 9 (7.4)                             | 0.054    |
| Strongly disagree                                                                                                             | 7 (5.7)                             | 5 (4.1)                             | 5 (4.1)                             | 6 (5.0)                             | 1 (0.8)                             |          |
| Government actions are needed for DF prevention.                                                                              |                                     |                                     |                                     |                                     |                                     |          |
| Strongly agree                                                                                                                | 48 (39.3)                           | 51 (41.5)                           | 43 (35.2)                           | 57 (47.1)                           | 55 (45.5)                           |          |
| Agree                                                                                                                         | 46 (37.7)                           | 47 (38.2)                           | 48 (39.3)                           | 38 (31.4)                           | 51 (42.1)                           |          |
| Not sure                                                                                                                      | 10 (8.2)                            | 1 (0.8)                             | 5 (4.1)                             | 3 (2.5)                             | 3 (2.5)                             |          |
| Disagree                                                                                                                      | 9 (7.4)                             | 13 (10.6)                           | 10 (8.2)                            | 9 (7.4)                             | 9 (7.4)                             | 0.054    |
| Strongly disagree                                                                                                             | 9 (7.4)                             | 11 (8.9)                            | 16 (13.1)                           | 14 (11.6)                           | 3 (2.5)                             |          |
| *Analyzed by ANOVA, but Fisher`s exact test was used where more than 20% of the cells had expected cell counts less than five |                                     |                                     |                                     |                                     |                                     |          |
