# Supplementary material for: Knowledge, attitude, and practice regarding dengue virus infection among inhabitants of Aceh, Indonesia: a cross-sectional study
Source: BMC Infect Dis. 2018 Feb 27;18:96. doi: 10.1186/s12879-018-3006-z (PMC5830327; doi:10.1186/s12879-018-3006-z)
Supplement: Supplementary file 4 — Distribution of good practice regarding dengue fever prevention among participant groups with different socioeconomic level. (PDF 101 kb) [file 12879_2018_3006_MOESM4_ESM.pdf]

Additional file 4 - Table. Distribution of good practice regarding dengue fever prevention among participant groups with different socioeconomic level

| Variables                                                                                                         | 1 <sup>st</sup> quintile<br>(n=122) | 2 <sup>nd</sup> quintile<br>(n=123) | 3 <sup>rd</sup> quintile<br>(n=122) | 4 <sup>th</sup> quintile<br>(n=121) | 5 <sup>th</sup> quintile<br>(n=121) | P-value* |
|-------------------------------------------------------------------------------------------------------------------|-------------------------------------|-------------------------------------|-------------------------------------|-------------------------------------|-------------------------------------|----------|
|                                                                                                                   | n (%)                               |          |
| Use screened windows to reduce mosquitoes. Yes                                                                    | 70 (57.4)                           | 87 (70.7)                           | 94 (77.0)                           | 99 (81.8)                           | 100 (82.6)                          | 0.000    |
| Prevent water stagnation. Yes                                                                                     | 104 (85.2)                          | 104 (84.6)                          | 107 (87.7)                          | 105 (86.8)                          | 107 (88.4)                          | 0.893    |
| Cut down bushes in the yard to reduce mosquitoes. Yes                                                             | 108 (88.5)                          | 110 (89.4)                          | 114 (93.4)                          | 115 (95.0)                          | 109 (90.1)                          | 0.310    |
| Use mosquito eating fish to reduce mosquitoes. Yes                                                                | 27 (22.1)                           | 34 (27.6)                           | 23 (18.9)                           | 31 (25.6)                           | 39 (32.3)                           | 0.148    |
| Cleaning of garbage/trash. Yes                                                                                    | 114 (93.4)                          | 113 (91.9)                          | 115 (94.3)                          | 116 (95.9)                          | 117 (96.7)                          | 0.491    |
| Disposing of water holding containers such as tires, parts of automobiles, plastic bottles, and cracked pots. Yes | 103 (84.4)                          | 103 (83.7)                          | 101 (82.8)                          | 104 (86.0)                          | 110 (90.9)                          | 0.402    |
| Use of fan to prevent mosquito biting. Yes                                                                        | 62 (50.8)                           | 83 (67.5)                           | 87 (71.3)                           | 95 (78.5)                           | 99 (81.8)                           | 0.000    |
| Covering body with clothes when working in the bush, farm or forest. Yes                                          | 96 (78.7)                           | 98 (79.7)                           | 100 (82.0)                          | 106 (87.6)                          | 110 (90.9)                          | 0.041    |
| Cover water containers in the home. Yes                                                                           | 98 (80.3)                           | 100 (81.3)                          | 97 (79.5)                           | 100 (82.6)                          | 112 (92.6)                          | 0.043    |
| Change the water plant containers in the house every week. Yes                                                    | 89 (73.0)                           | 107 (87.0)                          | 108 (88.5)                          | 110 (90.9)                          | 113 (93.4)                          | 0.000    |
| Change the water in flower containers. Yes                                                                        | 55 (45.1)                           | 74 (60.2)                           | 69 (56.6)                           | 80 (66.1)                           | 83 (68.6)                           | 0.002    |
| Check the waste/garbage that can block the flow of water around the home. Yes                                     | 103 (84.4)                          | 108 (87.8)                          | 107 (87.7)                          | 104 (86.0)                          | 113 (93.4)                          | 0.265    |
| Participate in any of the anti-dengue campaigns in the community. Yes                                             | 41 (33.6)                           | 42 (34.4)                           | 42 (34.4)                           | 44 (36.4)                           | 64 (52.9)                           | 0.008    |
| Check and clean the drains/gutters/roofs before the rainy season. Yes                                             | 64 (52.5)                           | 68 (55.3)                           | 73 (59.8)                           | 69 (57.0)                           | 84 (69.4)                           | 0.075    |
| Use a bed net when sleeping during the day. Yes                                                                   | 43 (35.2)                           | 28 (22.8)                           | 24 (19.7)                           | 32 (26.4)                           | 42 (34.7)                           | 0.018    |

[illegible]
